# Supplementary material for: A Bayesian Approach to Correcting the Attenuation Bias of Regression Using Polygenic Risk Score
Source: PubMed Central journal article supplement (PMC10705229; doi:10.1101/2023.11.27.568907), 2023-11-28
Supplement: NIHPP2023.11.27.568907V1-supplement-1.pdf [file NIHPP2023.11.27.568907V1-supplement-1.pdf]

## Supplementary materials

|             | No correction | Correction with measurement error |
|-------------|---------------|-----------------------------------|
| HDL~LDL     | 0.011         | 0.052                             |
| HDL~TC      | 0.142         | 0.015                             |
| HDL~log(TG) | 0.335         | 0.012                             |
| LDL~HDL     | 0.053         | 0.208                             |
| LDL~TC      | 0.571         | 0.006                             |
| LDL~log(TG) | 0.209         | 0.170                             |
| TC~HDL      | 0.206         | 0.197                             |
| TC~LDL      | 0.606         | 0.049                             |
| TC~log(TG)  | 0.226         | 0.154                             |
| TG~HDL      | 0.296         | 0.031                             |
| TG~LDL      | 0.225         | 0.086                             |
| TG~TC       | 0.244         | 0.016                             |
| Height~BMI  | 0.030         | 0.019                             |

Supplementary Table 1. Linear regression coefficients for pairs of continuous traits.

|             | No correction | Correction with measurement error |
|-------------|---------------|-----------------------------------|
| CAD~HDL     | 0.146         | 0.132                             |
| CAD~LDL     | 0.232         | 0.085                             |
| CAD~TC      | 0.193         | 0.089                             |
| CAD~log(TG) | 0.181         | 0.074                             |
| AF~HDL      | 0.006         | 0.085                             |
| AF~LDL      | 0.074         | 0.006                             |
| AF~TC       | 0.101         | 0.026                             |
| AF~log(TG)  | 0.126         | 0.012                             |
| DIA~HDL     | 0.502         | 0.135                             |
| DIA~LDL     | 0.092         | 0.020                             |
| DIA~TC      | 0.137         | 0.114                             |
| DIA~log(TG) | 0.446         | 0.116                             |

Supplementary Table 2. Logistic regression coefficients for binary outcomes.
